# Supplementary material for: Stress Driven Discovery of Natural Products From Actinobacteria with Anti-Oxidant and Cytotoxic Activities Including Docking and ADMET Properties
Source: MDPI journal article supplement (doi:10.3390/ijms222111432), 2021-10-22
Supplement: s1 [file s1]

# Stress Driven Discovery of Natural Products From Actinobacteria With Anti-Oxidant and Cytotoxic Activities Including Docking and ADMET properties

Syed Shams ul Hassan <sup>1,2</sup>, Ishaq Muhammad <sup>1,2</sup>, Syed Qamar Abbas <sup>3</sup>, Mubashir Hassan<sup>4</sup>, Muhammad Majid<sup>5\*</sup>, Hui-Zi Jin<sup>1,2\*</sup>, Simona Bungau<sup>6</sup>

<sup>1</sup> Shanghai Key Laboratory for Molecular Engineering of Chiral Drugs, School of Pharmacy, Shanghai Jiao Tong University, Shanghai, 200240, PR China; Shams1327@yahoo.com ,

<sup>2</sup> Department of Natural Product Chemistry, School of Pharmacy, Shanghai Jiao Tong University, Shanghai, 200240, PR China

<sup>3</sup> Department of Pharmacy, Sarhad University of Science and Technology, Peshawar, Pakistan; qamar0613@yahoo.com

<sup>4</sup> Institute of Molecular Biology and Biotechnology, The University of Lahore, Pakistan; mubashirhassan\_gcul@yahoo.com

<sup>5</sup> Department of Pharmacy, Capital University of Science and Technology, Islamabad, Pakistan; (majidpharma808@gmail.com)

<sup>6</sup> Department of Pharmacy, Faculty of Medicine and Pharmacy, University of Oradea, 410028 Oradea, Romania; (Simonabungau@gmail.com)

\* Correspondence: Kimhz@sjtu.edu.cn (H.Z.J), Majidpharma808@gamil.com (M.M),

## Supplementary data

Fig.S1. <sup>1</sup>H NMR spectrum of MVL

Fig.S2. <sup>13</sup>C NMR spectrum of MVL

Fig.S3. DEPT 135 spectrum of MVL

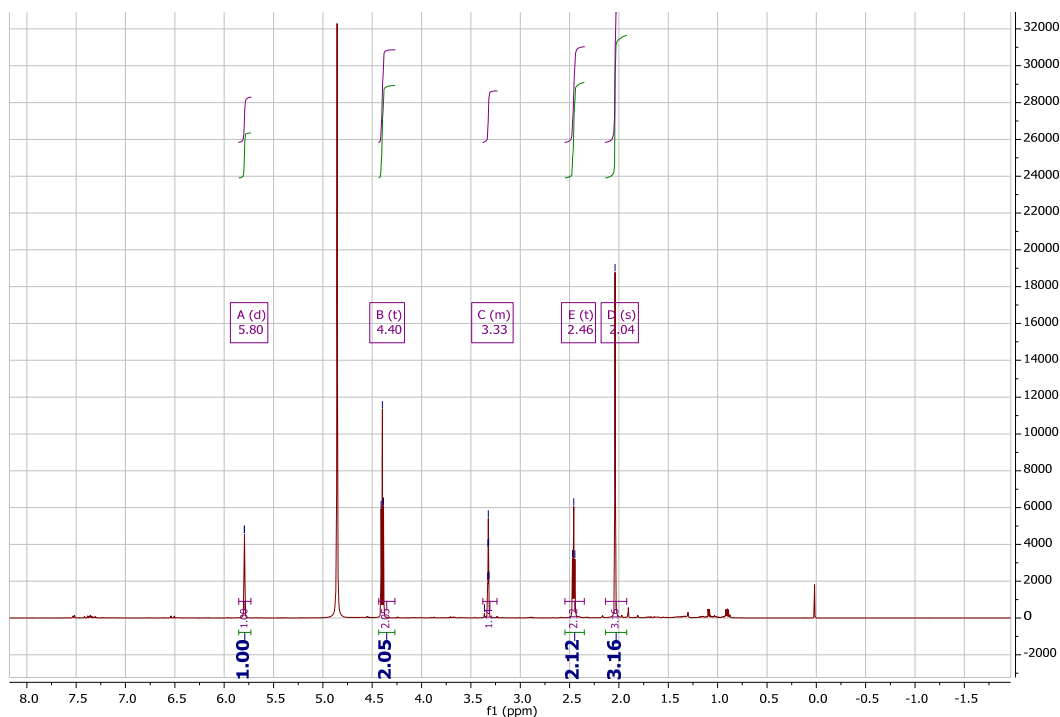

Fig.S1. <sup>1</sup>H NMR spectrum of MVL

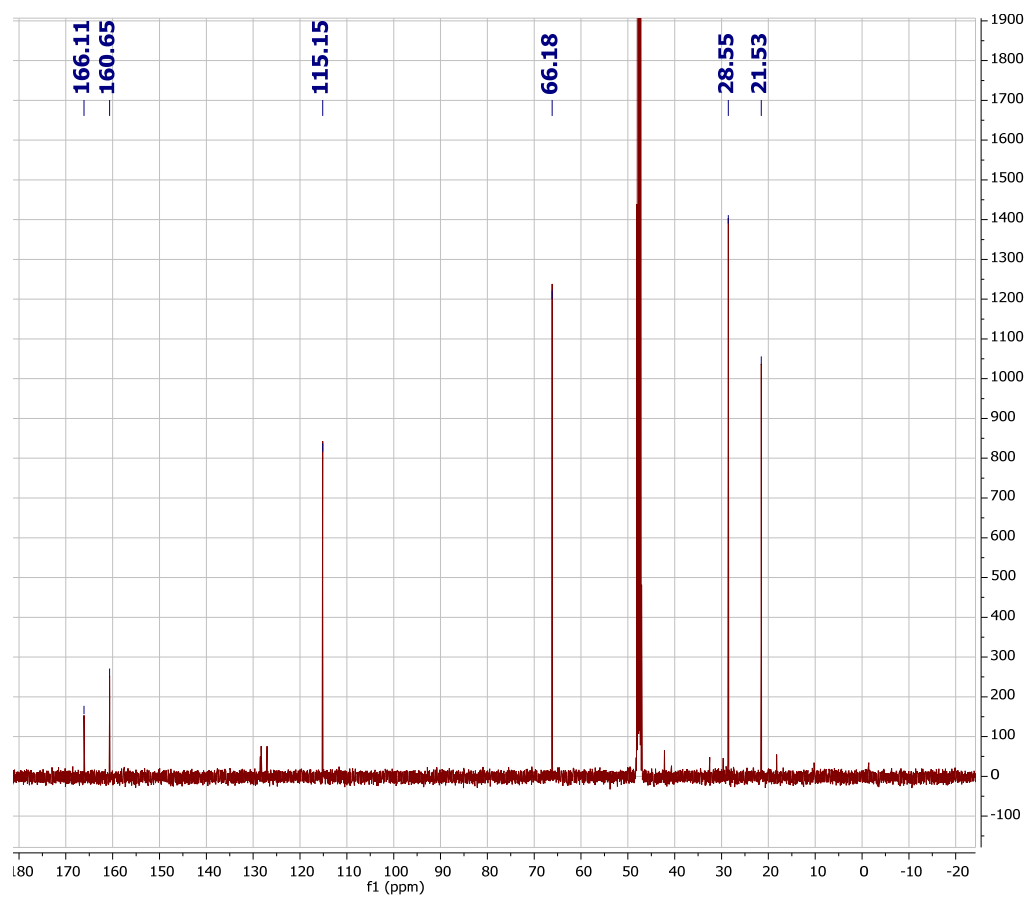

**Fig.S2.**  $^{13}\text{C}$  NMR spectrum of MVL

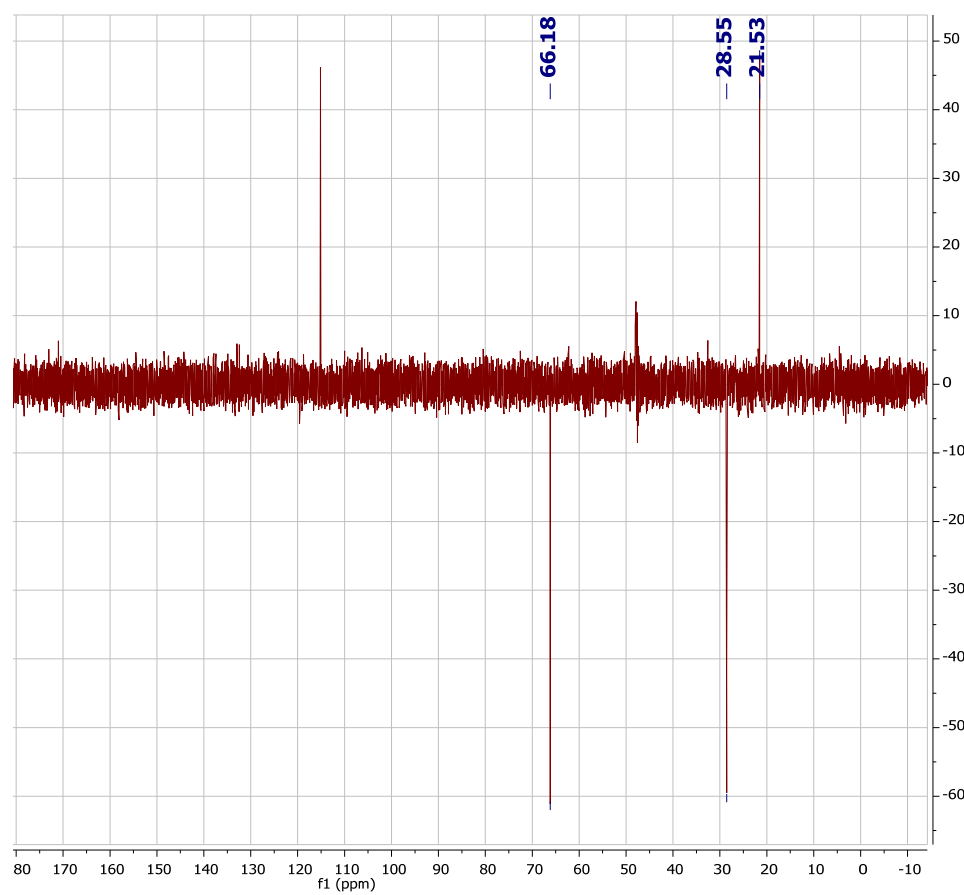

Fig.S3. DEPT 135 spectrum of MVL
